# Supplementary material for: Phylogeny of a Genomically Diverse Group of Elymus (Poaceae) Allopolyploids Reveals Multiple Levels of Reticulation
Source: PubMed Central journal article supplement (PMC3840256; doi:10.1371/journal.pone.0078449), 2013-11-01
Supplement: pone.0078449.s006.pdf [file pone.0078449.s006.pdf]

**Table S1. List of taxa, collection information, and Genbank accession numbers for sequences analyzed for Figures 2–5.**

| Eurasian <i>Elymus</i> –<br>StStHH              | Desig <sup>1</sup> | Voucher | Accession | Origin     | Genbank pepC <sup>2</sup>                          | Genbank $\beta$ -amy          | Genbank GBSSI                 | Genbank<br>rpoA          | Genbank<br>trnT-F        |
|-------------------------------------------------|--------------------|---------|-----------|------------|----------------------------------------------------|-------------------------------|-------------------------------|--------------------------|--------------------------|
| <i>Elymus breviaristatus</i><br>Keng ex Keng f. | 1                  | ID      | PI 499411 | China      | b-HM035290-St<br>e-HM035291-H                      | b-HM035223-St<br>a-HM035224-H | a-HM035268-St<br>b-HM035269-H | <a href="#">KF600660</a> | <a href="#">KF600684</a> |
| <i>Elymus caninus</i> (L.) L.                   | 1                  | ID      | PI 314205 | Uzbekistan | h-HM035292-St<br>b-HM035293-H                      | a-HM035225-St<br>d-HM035226-H | n-DQ159325-St<br>a-DQ159324-H | <a href="#">KF600661</a> | <a href="#">KF600685</a> |
| <i>Elymus caninus</i>                           | 2                  | ID      | PI 314612 | Kazakhstan | a-HM035294-St<br>d-HM035295-H<br>i-HM035296-H      | d-HM035227-St<br>c-HM035228-H | b-HM035270-St<br>a-HM035271-H | <a href="#">KF600662</a> | <a href="#">KF600686</a> |
| <i>Elymus caninus</i>                           | 4                  | ID      | PI 499413 | China      | d-HM035297-St<br>f-HM035298-H                      | d-HM035229-St<br>b-HM035230-H | a-HM035272-St<br>b-HM035273-H | <a href="#">KF600663</a> | <a href="#">KF600687</a> |
| <i>Elymus caninus</i>                           | 5                  | ID      | PI 531571 | Poland     | e-HM035299-St<br>g-HM035300-H                      | d-HM035231-St<br>e-HM035232-H | a-HM035274-St<br>b-HM035275-H | <a href="#">KF600664</a> | <a href="#">KF600688</a> |
| <i>Elymus dentatus</i><br>(Hook.f.) Tzvelev     | 1                  | ID      | PI 628702 | Russia     | d-HM035301-St<br>c-HM035302-H<br>e-HM035303-H      | a-HM035233-St<br>d-HM035234-H | a-DQ159328-St<br>b-DQ159329-H | DQ159334                 | DQ159290                 |
| <i>Elymus dentatus</i>                          | 2                  | ID      | PI 531599 | Pakistan   | a-HM035304-St<br>b-HM035305-H                      | i-HM035235-St<br>a-HM035236-H | a-HM035276-St<br>b-HM035277-H | <a href="#">KF600667</a> | <a href="#">KF600691</a> |
| <i>Elymus mutabilis</i><br>(Drobow) Tzvelev     | 1                  | ID      | PI 628704 | Russia     | NR-St <sup>3</sup><br>a-HM035306-H<br>i-HM035307-H | a-HM035237-St<br>c-HM035238-H | c-DQ159331-St<br>a-DQ159330-H | DQ159335                 | DQ159291                 |
| <i>Elymus mutabilis</i>                         | 2                  | ID      | PI 499449 | China      | h-HM035308-St<br>a-HM035309-H<br>f-HM035310-H      | h-HM035239-St<br>c-HM035240-H | a-HM035278-St<br>b-HM035279-H | <a href="#">KF600670</a> | <a href="#">KF600694</a> |
| <i>Elymus sibiricus</i> L.                      | 1                  | ID      | PI 628699 | Russia     | b-HM035311-St<br>a-HM035312-H                      | NR-St<br>b-HM035241-H         | b-HM035280-St<br>a-HM035281-H | <a href="#">KF600673</a> | <a href="#">KF600697</a> |
| <i>Elymus sibiricus</i>                         | 3                  | ID      | PI 499461 | China      | d-HM035313-St<br>a-HM035314-H                      | g-HM035242-St<br>b-HM035243-H | a-HM035282-St<br>b-HM035283-H | <a href="#">KF600674</a> | <a href="#">KF600698</a> |

| North American<br><i>Elymus</i> -StStHH                       | Desig <sup>1</sup> | Voucher | Accession          | Origin | Genbank pepC                  | Genbank $\beta$ -amy          | Genbank GBSSI                                   | Genbank<br>rpoA | Genbank<br>trnT-F |
|---------------------------------------------------------------|--------------------|---------|--------------------|--------|-------------------------------|-------------------------------|-------------------------------------------------|-----------------|-------------------|
| <i>Elymus canadensis</i> L.                                   | 1                  | ID      | Barkworth<br>97-86 | USA    | NS <sup>4</sup>               | NS                            | NS                                              | AY115928        | AF519131          |
| <i>Elymus canadensis</i>                                      | 2                  | ID      | PI 578675          | USA    | b-HM035315-St<br>a-AY553243-H | NS                            | NS                                              | AY115929        | AF519132          |
| <i>Elymus canadensis</i>                                      | 4                  | ID      | PI 531568          | USA    | b-AY553248-St<br>a-AY553242-H | a-HM035244-St<br>d-HM035245-H | c-HM035284-St<br>a-HM035285-H                   | AY115930        | AF519133          |
| <i>Elymus elymoides</i><br>(Raf.) Swezey                      | 1                  | ID      | PI 531606          | USA    | b-AY553249-St<br>a-AY553244-H | a-HM035246-St<br>c-HM035247-H | a2-AY010992-St<br>d2-AY010965-H                 | AY115932        | AF519135          |
| <i>Elymus glaucus</i> Buckley                                 | 4                  | ID      | RJMG 130           | USA    | NS                            | NS                            | a-AY01097-St<br>b-AY010966-H                    | AY115933        | AF519136          |
| <i>Elymus glaucus</i>                                         | 6                  | ID      | W6 10215           | USA    | b-AY553250-St<br>e-HM035316-H | NR-St<br>a-HM035248-H         | b-AY010980-St<br>a-AY010967-H                   | AY115934        | AF519137          |
| <i>Elymus glaucus</i>                                         | 7                  | ID      | PI 593652          | USA    | NS                            | NS                            | NS                                              | AY115935        | AF519138          |
| <i>Elymus hystrix</i> L.                                      | 1                  | ID      | Barkworth<br>97-87 | USA    | b-AY553251-St<br>a-AY553245-H | NR-St<br>a-HM035249-H         | a-AY010982-St<br>d-HM035286-H                   | AY115936        | AF519139          |
| <i>Elymus lanceolatus</i><br>(Scribn. & J.G.Sm.)<br>D.R.Dewey | 1                  | ID      | PI 632507          | USA    | NS                            | c-HM035250-St<br>a-HM035251-H | a-AY010993-St<br>d-AY010984-St<br>aa-AY010969-H | AY115937        | NS                |
| <i>Elymus lanceolatus</i>                                     | 2                  | ID      | PI 632506          | USA    | NS                            | a-HM035252-St<br>h-HM035253-H | c-AY010985-St<br>d-AY010994-St<br>a-AY010970-H  | NS              | NS                |
| <i>Elymus lanceolatus</i>                                     | 3                  | ID      | PI 531623          | USA    | b-AY553252-St<br>a-AY553246-H | NS                            | NS                                              | AY115938        | AF519140          |
| <i>Elymus riparius</i> Wiegand                                | 1                  | ID      | RJMG 160           | USA    | NS                            | a-HM035254-St<br>b-HM035255-H | NR-St<br>a-AY010971-H                           | NS              | NS                |
| <i>Elymus trachycaulus</i><br>(Link) Gould ex Shinners        | 1                  | ID      | PI 372500          | Canada | e-HM035317-St<br>a-HM035318-H | a-HM035256-St<br>b-HM035257-H | b1-AY010986-St<br>a1-AY010972-H                 | AY115939        | AF519141          |
| <i>Elymus trachycaulus</i>                                    | 3                  | ID      | PI 452446          | Canada | NS                            | NS                            | d-AY010987-St<br>a-AY010973-H<br>b-AY010974-H   | AY115940        | AF519142          |

|                                                       |                          |                |                  |               |                                                |                                       |                                                |                          |                          |
|-------------------------------------------------------|--------------------------|----------------|------------------|---------------|------------------------------------------------|---------------------------------------|------------------------------------------------|--------------------------|--------------------------|
| <i>Elymus virginicus</i> L.                           | 1                        | ID             | PI436945         | USA           | NS                                             | NS                                    | NS                                             | AY115941                 | AF519143                 |
| <i>Elymus virginicus</i>                              | 2                        | ID             | PI490361         | USA           | NS                                             | NS                                    | NS                                             | AY115942                 | AF519144                 |
| <i>Elymus virginicus</i>                              | 4                        | ID             | RJMG 161         | USA           | NR-St<br>a-HM035319-H                          | NR-St<br>a-HM035258-H                 | d-AY010995-St<br>a-AY010975-H                  | NS                       | NS                       |
| <i>Elymus virginicus</i>                              | 6                        | ID             | RJMG163          | USA           | NS                                             | NS                                    | NS                                             | AY115943                 | AF519145                 |
| <i>Elymus virginicus</i>                              | 9                        | ID             | RJMG 168         | USA           | d-HM035320-St<br>a-HM035321-H                  | a-HM035259-St<br>e-HM035260-H         | a-AY010989-St<br>b-AY010976-H                  | NS                       | NS                       |
| <i>Elymus wawawaiensis</i><br>J.R.Carlson & Barkworth | 1                        | ID             | PI 285272        | USA           | NS                                             | a-HM035261-St<br>d-HM035262-H         | c-AY010996-St<br>a-AY010977-H                  | AY115944                 | AF519146                 |
| <i>Elymus wawawaiensis</i>                            | 3                        | ID             | PI 598812        | USA           | b-AY553253-St<br>a-AY553247-H                  | c-HM035263-St<br>b-HM035264-H         | a-AY010990-St<br>b-AY010997-St<br>d-AY010978-H | AY115945                 | AF519147                 |
| <b>Asian <i>Elymus</i>-StStYY</b>                     | <b>Desig<sup>1</sup></b> | <b>Voucher</b> | <b>Accession</b> | <b>Origin</b> | <b>Genbank pepC</b>                            | <b>Genbank <math>\beta</math>-amy</b> | <b>Genbank GBSSI</b>                           | <b>Genbank rpoA</b>      | <b>Genbank trnT-F</b>    |
| <i>Elymus abolinii</i><br>(Drobow) Tzvelev            | 1                        | ID             | PI 531555        | China         | b-GQ844927-St<br>a-GQ844928-Y                  | b-GQ847678-St<br>a-GQ847679-Y         | a-DQ159322-St<br>b-DQ159323-Y                  | DQ159332                 | DQ159288                 |
| <i>Elymus abolinii</i>                                | 2                        | ID             | PI 531557        | Estonia       | b-GQ844929-St<br>i-GQ844930-Y                  | a-GQ847680-St<br>NR-Y                 | k-GQ847708-St<br>a-GQ847709-Y<br>e-GQ847710-Y  | NS                       | NS                       |
| <i>Elymus antiquus</i><br>(Nevski) Tzvelev            | 1                        | ID             | PI 632564        | China         | g-GQ844931-St<br>a-GQ844932-Y                  | a-GQ847681-St<br>f-GQ847682-Y         | a-GQ847711-St<br>b-GQ847712-Y                  | <a href="#">KF600659</a> | <a href="#">KF600683</a> |
| <i>Elymus antiquus</i>                                | 2                        | ID             | PI 564958        | China         | a-GQ844933-St<br>c-GQ844934-Y                  | a-GQ847683-St<br>e-GQ847684-Y         | g-GQ847713-St<br>a-GQ847714-Y                  | NS                       | NS                       |
| <i>Elymus antiquus</i>                                | 3                        | ID             | PI 619528        | China         | b-GQ844935-St<br>d-GQ844936-St<br>c-GQ844937-Y | a-GQ847685-St<br>e-GQ847686-Y         | b-GQ847715-St<br>a-GQ847716-Y                  | NS                       | NS                       |
| <i>Elymus antiquus</i>                                | 4                        | ID             | PI 564957        | China         | c-GQ844938-St<br>h-GQ844939-Y                  | d-GQ847687-St<br>a-GQ847688-Y         | b-GQ847717-St<br>a-GQ847718-Y                  | NS                       | NS                       |
| <i>Elymus caucasicus</i><br>(K.Koch) Tzvelev          | 1                        | ID             | PI 531573        | Estonia       | a-GQ844940-St<br>d-GQ844941-Y                  | b-GQ847689-St<br>a-GQ847690-Y         | NR-St<br>a-GQ847719-Y<br>b-GQ847720-Y          | DQ159333                 | DQ159289                 |

|                                                         |   |    |           |             |                                               |                               |                                                |                          |                          |
|---------------------------------------------------------|---|----|-----------|-------------|-----------------------------------------------|-------------------------------|------------------------------------------------|--------------------------|--------------------------|
| <i>Elymus ciliaris</i><br>(Trin.) Tzvelev               | 1 | GH | PI 531575 | China       | b-GQ844942-St<br>c-GQ844943-Y<br>h-GQ844944-Y | g-GQ847691-St<br>h-GQ847692-Y | g-DQ159327-St<br>b-DQ159326-Y                  | AY115931                 | AF519134                 |
| <i>Elymus ciliaris</i>                                  | 2 | ID | PI 531577 | Japan       | d-GQ844945-St<br>a-GQ844946-Y                 | f-GQ847693-St<br>i-GQ847694-Y | a-GQ847721-St<br>b-GQ847722-Y                  | <a href="#">KF600665</a> | <a href="#">KF600689</a> |
| <i>Elymus ciliaris</i>                                  | 5 | ID | PI 531576 | Estonia     | a-GQ844947-St<br>c-GQ844948-Y                 | e-GQ847695-St<br>a-GQ847696-Y | a-GQ847723-St<br>b-GQ847724-St<br>c-GQ847725-Y | <a href="#">KF600666</a> | <a href="#">KF600690</a> |
| <i>Elymus gmelinii</i><br>(Ledeb.) Tzvelev              | 1 | ID | PI 499447 | China       | NR-St<br>a-GQ844949-Y                         | e-GQ847697-St<br>f-GQ847698-Y | a-GQ847726-St<br>b-GQ847727-Y                  | <a href="#">KF600668</a> | <a href="#">KF600692</a> |
| <i>Elymus longearistatus</i><br>(Boiss.) Tzvelev        | 1 | ID | PI 401277 | Iran        | c-GQ844950-St<br>aa-GQ84451-Y                 | NR-St<br>e-GQ847699-Y         | NR-St<br>d-GQ847728-Y                          | <a href="#">KF600669</a> | <a href="#">KF600693</a> |
| <i>Elymus nevskii</i> Tzvelev                           | 1 | ID | PI 314620 | Kazakhstan  | a-GQ844952-St<br>b-GQ844953-Y                 | k-GQ847700-St<br>b-GQ847701-Y | a-GQ847729-St<br>b-GQ847730-Y                  | <a href="#">KF600671</a> | <a href="#">KF600695</a> |
| <i>Elymus pendulinus</i><br>(Nevski) Tzvelev            | 1 | ID | PI 499452 | China       | a-GQ844954-St<br>b-GQ844955-Y                 | i-GQ847702-St<br>b-GQ847703-Y | a-GQ847731-St<br>b-GQ847732-Y                  | <a href="#">KF600672</a> | <a href="#">KF600696</a> |
| <i>Elymus semicostatus</i><br>(Nees ex Steud.) Melderis | 1 | ID | PI 271522 | India       | d-GQ844956-St<br>a-GQ844957-Y                 | c-GQ847704-St<br>a-GQ847705-Y | f-GQ847733-St<br>d-GQ847734-Y                  | NS                       | NS                       |
| <i>Elymus semicostatus</i>                              | 2 | ID | PI 207453 | Afghanistan | a-GQ844958-St<br>NR-Y                         | NR-St<br>a-GQ847706-Y         | a-GQ847735-St<br>e-GQ847736-Y                  | NS                       | NS                       |

| <i>Elymus repens</i> –<br>StStHHUkUk | Desig <sup>1</sup> | Voucher | Accession | Origin | Genbank pepC    | Genbank β-amy | Genbank GBSSI                                                                  | Genbank<br>rpoA | Genbank<br>trnT-F |
|--------------------------------------|--------------------|---------|-----------|--------|-----------------|---------------|--------------------------------------------------------------------------------|-----------------|-------------------|
| <i>Elymus repens</i> (L.) Gould      | 1                  | ID      | RJMG119   | USA    | g-EU282271-St   | d-EU282239-St | f <sup>6</sup> -AY360849-St<br>c-AY360826-St                                   | AY362780        | AY362786          |
|                                      |                    |         |           |        | a-EU282269-H    | q-EU282240-H  | e-AY360827-H                                                                   |                 |                   |
|                                      |                    |         |           |        | q-EU282272-H    | r-EU282241-H  |                                                                                |                 |                   |
|                                      |                    |         |           |        | b-EU282270-Uk   | c-EU282238-Uk | q-AY360828-Uk1                                                                 |                 |                   |
|                                      |                    |         |           |        | NH <sup>5</sup> | NH            | a1-AY360825-T                                                                  |                 |                   |
|                                      |                    |         |           |        | NH              | NH            | g <sup>6</sup> -AY360858-Uk2                                                   |                 |                   |
| <i>Elymus repens</i>                 | 2                  | ID      | RJMG122   | USA    | NR-St           | i-EU282243-St | g <sup>6</sup> -AY360850-St                                                    | AY362781        | AY362787          |
|                                      |                    |         |           |        | b-EU282274-H    | k-EU282244-H  | NR-H                                                                           |                 |                   |
|                                      |                    |         |           |        | h-EU282275-H    |               |                                                                                |                 |                   |
|                                      |                    |         |           |        | a-EU282273-Uk   | a-EU282242-Uk | aa-AY360830-Uk1<br>cc-AY360832-Uk1                                             |                 |                   |
|                                      |                    |         |           |        | NH              | NH            | bb-AY360831-T                                                                  |                 |                   |
|                                      |                    |         |           |        | NH              | NH            | hh-AY360829-T                                                                  |                 |                   |
|                                      |                    |         |           |        | NH              | NH            | h <sup>6</sup> -AY360859-Uk2                                                   |                 |                   |
| <i>Elymus repens</i>                 | 3                  | ID      | RJMG131   | USA    | d-EU282276-St   | a-EU282245-St | f <sup>6</sup> -AY360851-St                                                    | AY362782        | AY362788          |
|                                      |                    |         |           |        | f-EU282277-St   |               |                                                                                |                 |                   |
|                                      |                    |         |           |        | h-EU282278-H    | d-EU282247-H  | NR-H                                                                           |                 |                   |
|                                      |                    |         |           |        |                 | I-EU282248-H  |                                                                                |                 |                   |
|                                      |                    |         |           |        | i-EU282279-Uk   | c-EU282246-Uk | h <sup>6</sup> -AY360852-Uk1                                                   |                 |                   |
|                                      |                    |         |           |        | NH              | NH            | a-AY360833-T                                                                   |                 |                   |
|                                      |                    |         |           |        | NH              | NH            | aa-AY360834-T                                                                  |                 |                   |
|                                      |                    |         |           |        | NH              | NH            | dd-AY360835-T                                                                  |                 |                   |
|                                      |                    |         |           |        | NH              | NH            | g <sup>6</sup> -AY360860-Uk2                                                   |                 |                   |
| <i>Elymus repens</i>                 | 4                  | ID      | RJMG159   | USA    | e-EU282281-St   | b-EU282250-St | NR-St                                                                          | AY362783        | AY362789          |
|                                      |                    |         |           |        | q-EU282283-St   |               |                                                                                |                 |                   |
|                                      |                    |         |           |        | m-EU282282-H    | x-EU282251-H  | dd-AY360839-H                                                                  |                 |                   |
|                                      |                    |         |           |        | c-EU282280-Uk   | a-EU282249-Uk | a-AY360836-Uk1<br>b <sup>6</sup> -AY360853-Uk1<br>i <sup>6</sup> -AY360854-Uk1 |                 |                   |
|                                      |                    |         |           |        | NH              | NH            | aa-AY360838-T                                                                  |                 |                   |
|                                      |                    |         |           |        | NH              | NH            | t <sup>6</sup> -AY360837-T                                                     |                 |                   |

|                                                                   |                          |                |                     |               |                                                                                                                         |                                                                        |                                                                                                                                            |                     |                       |
|-------------------------------------------------------------------|--------------------------|----------------|---------------------|---------------|-------------------------------------------------------------------------------------------------------------------------|------------------------------------------------------------------------|--------------------------------------------------------------------------------------------------------------------------------------------|---------------------|-----------------------|
| <i>Elymus repens</i>                                              | 5                        | ID             | RJMG166             | USA           | i-EU282288-St<br>l-EU282289-St<br>a-EU282284-H<br>b-EU282285-H<br>c-EU282286-H<br>e-EU282287-Uk<br>NH<br>NH<br>NH<br>NH | b-EU282253-St<br>a-EU282252-H<br>c-EU282254-Uk<br>NH<br>NH<br>NH<br>NH | NR-St<br>j <sup>6</sup> -AY360855-H<br>k-AY360840-Uk1<br>cc-AY360841-T<br>dd-AY360842-T<br>b <sup>6</sup> -AY360861-Uk2<br>hh-AY360843-Uk2 | AY362784            | AY362790              |
| <i>Elymus repens</i>                                              | 6                        | ID             | RJMG167             | USA           | d-EU282291-St<br>c-EU282290-H<br>e-EU282292-Uk<br>NH                                                                    | NS<br>NH                                                               | a <sup>6</sup> -AY360856-St<br>g <sup>6</sup> -AY360857-St<br>dd-AY360845-H<br>hh-AY360846-Uk1<br>a2-AY360844-T                            | AY362785            | AY362791              |
| <b>Monogenomic Triticeae</b>                                      | <b>Desig<sup>1</sup></b> | <b>Voucher</b> | <b>Accession</b>    | <b>Origin</b> | <b>Genbank pepC</b>                                                                                                     | <b>Genbank β-amy</b>                                                   | <b>Genbank GBSSI</b>                                                                                                                       | <b>Genbank rpoA</b> | <b>Genbank trnT-F</b> |
| <i>Aegilops bicornis</i><br>(Forsskål) Jaub. & Spach              | 1                        | GH             | L. Morrison<br>s.n. |               | NS                                                                                                                      | AY821686                                                               | NS                                                                                                                                         | NS                  | NS                    |
| <i>Aegilops caudata</i> L.                                        | 1                        | GH             | G 758               |               | NS                                                                                                                      | a-AY821687<br>b-AY821688<br>c-AY821689                                 | AF079262                                                                                                                                   | AY115908            | AF519111              |
| <i>Aegilops comosa</i><br>Sibth. & Sm.                            | 1                        | GH             | G 602               |               | AY553236                                                                                                                | a-AY821690<br>g-AY821696                                               | NS                                                                                                                                         | NS                  | NS                    |
| <i>Aegilops speltoides</i><br>Tausch                              | 1                        | GH             | L. Morrison<br>s.n. |               | NS                                                                                                                      | <a href="#">KF600658</a>                                               | AF079267                                                                                                                                   | AY115909            | AF519112              |
| <i>Aegilops tauschii</i> Coss.                                    | 1                        | GH             | L. Morrison<br>s.n. |               | NS                                                                                                                      | AY821695                                                               | AF079268                                                                                                                                   | AY115910            | AF519113              |
| <i>Aegilops uniaristata</i> Vis.                                  | 1                        | GH             | G 1297              |               | NS                                                                                                                      | AY821691                                                               | AF079270                                                                                                                                   | AY115911            | AF519114              |
| <i>Agropyron cristatum</i><br>(L.) Gaertn.                        | 1                        | GH             | PI 279802           | Canada        | AY553237                                                                                                                | AY821697                                                               | AF079271                                                                                                                                   | AY115912            | AF519115              |
| <i>Agropyron cristatum</i><br><i>Agropyron mongolicum</i><br>Keng | 2                        | GH             | PI 281862           | Germany       | NS                                                                                                                      | NS                                                                     | AY011002                                                                                                                                   | AY115913            | AF519116              |
| <i>Australopyrum</i><br><i>retrofractum</i> (Vickery)<br>Å.Löve   | 1                        | GH             | D 2774              | China         | NS                                                                                                                      | NS                                                                     | AY011003                                                                                                                                   | AY115914            | AF519117              |
| <i>Australopyrum velutinum</i><br>(Nees) B.K.Simon                | 1                        | GH             | PI 533013           | Australia     | NS                                                                                                                      | AY821692                                                               | AF079272                                                                                                                                   | AY115915            | AF519118              |
| <i>Crithopsis delileana</i><br>(Schult.) Roshev.                  | 1                        | GH             | D 2873-2878         | Australia     | AY553238                                                                                                                | AY821693                                                               | AY011004                                                                                                                                   | AY115916            | AF519119              |
|                                                                   | 1                        | GH             | H 5562              | Jordan        | NS                                                                                                                      | AY821694                                                               | GQ847707                                                                                                                                   | NS                  | NS                    |

|                                                           |   |    |             |            |                                        |                          |                          |          |                          |
|-----------------------------------------------------------|---|----|-------------|------------|----------------------------------------|--------------------------|--------------------------|----------|--------------------------|
| <i>Dasypyrum villosum</i><br>(L.) Candargy                | 1 | GH | PI 251478   | Turkey     | NS                                     | AY821698                 | AF079274                 | AY115925 | AF519128                 |
| <i>Dasypyrum villosum</i>                                 | 2 | GH | PI 470279   | Turkey     | NS                                     | AY821699                 | NS                       | AY115926 | AF519129                 |
| <i>Dasypyrum villosum</i>                                 | 3 | GH | D 2990      | Australia  | AY553240                               | NS                       | NS                       | NS       | NS                       |
| <i>Eremopyrum bonaepartis</i><br>(Spreng.) Nevski         | 1 | GH | H 5554      | Iran       | NS                                     | AY821700                 | AY011005                 | AY115946 | AF519148                 |
| <i>Eremopyrum bonaepartis</i>                             | 2 | GH | H 5569      |            | NS                                     | NS                       | NS                       | AY115947 | AF519149                 |
| <i>Eremopyrum distans</i><br>(K.Koch) Nevski              | 1 | GH | H 5552      | Iran       | NS                                     | AY821701                 | AY011006                 | AY115948 | AF519150                 |
| <i>Eremopyrum orientale</i> (L.)<br>Jaub. & Spach         | 1 | GH | H 5555      | Iran       | AY553254                               | AY821702                 | AY011007                 | AY115949 | AF519151                 |
| <i>Henrardia persica</i> (Boiss.)<br>C.E.Hubb.            | 1 | GH | H 5556      | Iran       | NS                                     | AY821703                 | AF079276                 | AY115950 | AF519152                 |
| <i>Heterantherium piliferum</i><br>(Banks & Sol.) Hochst. | 1 | GH | PI 402352   | Iran       | AY553255                               | AY821704                 | AF079277                 | AY115951 | AF519153                 |
| <i>Hordeum bogdanii</i><br>Wilensky                       | 1 | ID | PI 531762   | Tajikistan | NS                                     | GQ847675                 | EU282316                 | NS       | NS                       |
| <i>Hordeum bogdanii</i>                                   | 2 | ID | PI 531760   | China      | EU282293                               | EU282255                 | EU282317                 | NS       | NS                       |
| <i>Hordeum brachyantherum</i><br>Nevski                   | 1 | GH | PI 531764   | USA        | NS                                     | NS                       | NS                       | AY115917 | AF519120                 |
| <i>Hordeum brevisubulatum</i><br>(Trin.) Link             | 1 | GH | PI 401387   | Iran       | NS                                     | a-AY821705<br>d-AY821712 | AY010961                 | AY115918 | AF519121                 |
| <i>Hordeum brevisubulatum</i>                             | 2 | GH | PI 401390   | Iran       | NS                                     | AY821713                 | AY010964                 | NS       | NS                       |
| <i>Hordeum bulbosum</i> L.                                | 1 | GH | PI 440417   | Kazakhstan | a-EU282294<br>b-EU282295<br>c-EU282296 | AY821706                 | AY010962                 | AY115919 | AF519122                 |
| <i>Hordeum californicum</i><br>Covas & Stebbins           | 1 | GH | MA-138-1-40 | USA        | AY553256                               | AY821707                 | AF079273                 | NS       | <a href="#">KF600706</a> |
| <i>Hordeum chilense</i><br>Roem. & Schult.                | 1 | ID | PI 531781   | Argentina  | EU282297                               | -                        | EU282318                 | NS       | NS                       |
| <i>Hordeum jubatum</i> L.                                 | 1 | ID | RJMG 106    | USA        | a-AY553257<br>f-HM035287               | a-AY821708<br>b-AY821709 | a-AY010963<br>d-HM035266 | AY115920 | AF519123                 |
| <i>Hordeum jubatum</i>                                    | 2 | ID | RJMG 134    | USA        | f-HM035288<br>i-HM035289               | c-AY821710<br>a-AY821711 | f-HM035265<br>m-HM035267 | NS       | NS                       |
| <i>Hordeum marinum</i> Huds.                              | 1 | ID | PI 304346   | USA        | AY553258                               | a-EU282256<br>b-EU282257 | AY010959                 | AY115921 | AF519124                 |
| <i>Hordeum marinum</i>                                    | 2 | ID | PI 401364   | Iran       | NS                                     | NS                       | NS                       | NS       | <a href="#">KF600707</a> |
| <i>Hordeum marinum</i>                                    | 3 | ID | PI 304347   | England    | EU282298                               | EU282258                 | EU282319                 | NS       | NS                       |
| <i>Hordeum murinum</i> L.                                 | 1 | ID | PI 247054   | USA        | a-EU282299<br>b-EU282300               | EU282259                 | EU282320                 | AY115922 | AF519125                 |
| <i>Hordeum murinum</i>                                    | 2 | ID | CIho 15683  | USA        | AY553259                               | EU282260                 | AY010960                 | AY115923 | AF519126                 |

|                                                                                   |   |    |            |             |                          |          |                          |                          |                          |
|-----------------------------------------------------------------------------------|---|----|------------|-------------|--------------------------|----------|--------------------------|--------------------------|--------------------------|
| <i>Hordeum pusillum</i> Nutt.                                                     | 2 | ID | Clho 15654 | USA         | EU282301                 | EU282261 | EU282321                 | AY115924                 | AF519127                 |
| <i>Hordeum stenostachys</i> Godr.                                                 | 1 | ID | PI 531791  | Argentina   | EU282302                 | EU282262 | EU282322                 | NS                       | NS                       |
| <i>Hordeum vulgare</i> L.                                                         | 1 | na |            |             | NS                       | NS       | X07931                   | NS                       | NS                       |
| <i>Hordeum vulgare</i>                                                            | 2 | ID | RJMG 107   | USA         | AY553260                 | EU282263 | NS                       | NS                       | <a href="#">KF600708</a> |
| <i>Leymus racemosus</i> ssp. <i>sabulosus</i> (M.Bieb.) Tzvelev                   | 1 | GH | PI 531813  | Estonia     | AY553261                 | NS       | NS                       | NS                       | NS                       |
| <i>Peridictyon sanctum</i> (Janka) Seberg, Fred., & Baden                         | 1 | GH | KJ 248     | Greece      | AY553262                 | AY821714 | AF079278                 | AY115952                 | AF519154                 |
| <i>Psathyrostachys fragilis</i> (Boiss.) Nevski                                   | 1 | GH | PI 343192  | Iran        | NS                       | AY821715 | AF079279                 | AY115967                 | AF519169                 |
| <i>Psathyrostachys juncea</i> (Fisch.) Nevski                                     | 1 | GH | PI 206684  | Turkey      | NS                       | AY821716 | AF079280                 | AY115968                 | AF519170                 |
| <i>Pseudoroegneria libanotica</i> (Hack.) D.R.Dewey                               | 1 | GH | PI 228391  | Iran        | EU282304                 | EU282264 | EU282324                 | AY115955                 | AF519156                 |
| <i>Pseudoroegneria libanotica</i>                                                 | 3 | GH | PI 228392  | Iran        | EU282305                 | EU282265 | EU282325                 | <a href="#">KF600675</a> | <a href="#">KF600699</a> |
| <i>Pseudoroegneria spicata</i> (Pursh) Á.Löve subsp. <i>spicata</i>               | 1 | GH | PI 232117  | USA         | NS                       | AY821717 | AF079281                 | NS                       | NS                       |
| <i>Pseudoroegneria spicata</i> subsp. <i>inermis</i> (Scribn. & J.G.Smith) Á.Löve | 2 | GH | PI 236681  | Canada      | NS                       | AY821718 | AY010998                 | AY115956                 | AF519157                 |
| <i>Pseudoroegneria spicata</i> subsp. <i>spicata</i>                              | 3 | GH | PI 610986  | USA         | AY553263                 | NS       | AY010999                 | AY115957                 | AF519158                 |
| <i>Pseudoroegneria spicata</i> subsp. <i>spicata</i>                              | 4 | GH | D 2844     | USA         | AY553264                 | AY821719 | AY011000                 | AY115958                 | AF519159                 |
| <i>Pseudoroegneria spicata</i> subsp. <i>spicata</i>                              | 6 | ID | RJMG 112   | USA         | NS                       | AY821720 | a-AY011001<br>c-AY010991 | <a href="#">KF600676</a> | <a href="#">KF600700</a> |
| <i>Pseudoroegneria spicata</i> subsp. <i>inermis</i>                              | 8 | GH | D 2839     | USA         | NS                       | NS       | NS                       | AY115959                 | AF519160                 |
| <i>Pseudoroegneria stipifolia</i> (Czern. ex Nevski) Á.Löve                       | 2 | GH | PI 313960  | Former USSR | EU282306                 | EU282266 | NS                       | <a href="#">KF600677</a> | <a href="#">KF600701</a> |
| <i>Pseudoroegneria stipifolia</i>                                                 | 3 | GH | PI 531751  | Ukraine     | a-EU282307<br>d-EU282308 | AY821721 | NS                       | <a href="#">KF600678</a> | <a href="#">KF600702</a> |
| <i>Pseudoroegneria strigosa</i> (M.Bieb.) Á.Löve                                  | 1 | GH | PI 499637  | China       | b-EU282309<br>d-EU282310 | NS       | EU282323                 | AY115953                 | AF519155                 |
| <i>Pseudoroegneria strigosa</i> ssp. <i>aegilopoides</i> (Drobow) Á.Löve          | 2 | GH | PI 531755  | China       | EU282311                 | EU282267 | AY360823                 | AY115954                 | <a href="#">KF624612</a> |
| <i>Pseudoroegneria tauri</i> (Boiss. & Balansa) Á.Löve                            | 1 | GH | PI 380652  | Iran        | EU282312                 | EU282268 | EU282326                 | <a href="#">KF600679</a> | <a href="#">KF600703</a> |
| <i>Pseudoroegneria tauri</i>                                                      | 2 | GH | PI 401319  | Iran        | EU282313                 | NS       | EU282327                 | <a href="#">KF600680</a> | <a href="#">KF600704</a> |

|                                                                         |   |    |                    |             |                          |                          |                          |          |          |
|-------------------------------------------------------------------------|---|----|--------------------|-------------|--------------------------|--------------------------|--------------------------|----------|----------|
| <i>Pseudoroegneria tauri</i>                                            | 3 | GH | PI 380644          | Iran        | a-EU282314<br>b-EU282315 | NS                       | -                        | KF600681 | KF600705 |
| <i>Secale cereale</i> L.                                                | 1 | GH | E.Kellogg s.n.     |             | AY553266                 | a-AY821723<br>b-AY821724 | AY011009                 | AY115960 | AF519162 |
| <i>Secale montanum</i><br>(C.Presl.) C.Presl.                           | 1 | GH | PI 440654          | Hungary     | NS                       | NS                       | AF079282                 | AY115961 | AF519161 |
| <i>Secale montanum</i>                                                  | 2 | GH | T 36554            |             | NS                       | AY821725                 | NS                       | NS       | NS       |
| <i>Secale strictum</i> subsp.<br><i>anatolicum</i> (Boiss.)<br>K.Hammer | 1 | GH | PI 206992          | Turkey      | AY553265                 | AY821722                 | AY011008                 | AY115962 | AF519163 |
| <i>Taeniatherum caput-medusae</i> (L.) Nevski                           | 1 | GH | PI 208075          | Turkey      | -                        | AY821726                 | AY011010                 | AY115963 | AF519164 |
| <i>Taeniatherum caput-medusae</i>                                       | 2 | ID | RJMG 189           | USA         | AY553268                 | AY821727                 | b-AY360847<br>e-AY360848 | NS       | NS       |
| <i>Taeniatherum caput-medusae</i>                                       | 3 | ID | PI 314697          | Kazakhstan  | NS                       | AY821728                 | NS                       | NS       | NS       |
| <i>Taeniatherum caput-medusae</i>                                       | 4 | ID | PI 317475          | Afghanistan | NS                       | AY821729                 | NS                       | NS       | NS       |
| <i>Thinopyrum bessarabicum</i><br>(Savul. & Rayss) Á.Löve               | 1 | GH | PI531711           | Estonia     | NS                       | AY821730                 | AF079283                 | AY115964 | AF519165 |
| <i>Thinopyrum elongatum</i><br>(Host) D.R.Dewey                         | 1 | GH | PI 531719          | France      | NS                       | AY821731                 | AF079284                 | AY115965 | AF519166 |
| <i>Thinopyrum elongatum</i>                                             | 2 | ID | RJMG 113           | USA         | AY553269                 | NS                       | NS                       | NS       | NS       |
| <i>Thinopyrum scirpeum</i><br>(C.Presl.) D.R.Dewey                      | 1 | GH | PI 531749          | Italy       | NS                       | GQ847676                 | AY011011                 | AY115966 | AF519167 |
| <i>Triticum aestivum</i> L.                                             | 1 | na |                    |             | AJ007705                 | NS                       | NS                       | NS       | NS       |
| <i>Triticum baeoticum</i> Boiss.                                        | 1 | GH | L.Morrison<br>s.n. |             | NS                       | AY821732                 | AF079285                 | NS       | AF519168 |
| <i>Triticum monococcum</i> L.                                           | 1 | GH | PI 221413          | Serbia      | NS                       | AY821733                 | NS                       | NS       | NS       |
| <i>Triticum urartu</i> Tumanian                                         | 1 | GH | L.Morrison<br>s.n. |             | NS                       | GQ847677                 | AF079287                 | NS       | NS       |
| <i>Bromus tectorum</i> L.                                               | 1 | GH | E.Kellogg s.n.     | USA         | AY553239                 | AY821734                 | AY362757                 | KF600682 | KF600709 |

<sup>1</sup>Numerical designations distinguish individuals within species, and correspond to the numbers after the taxon names in Figs. 2–6.

<sup>2</sup>Letter designations preceding Genbank accession number distinguish clones from within individuals where applicable, and correspond to the letters following the numerical designations in Figs. 2–6. Genome designations for each sequence following accession numbers were determined based on phylogeny.

<sup>3</sup>NR – sequence expected based on presumed genomic complement but Not Recovered.

<sup>4</sup>NS – gene or region was Not Sequenced for that individual.

<sup>5</sup>NH – there is No Homoeolog of pepC or  $\beta$ -amy corresponding to the T or Uk2 GBSSI homoeologues of *E. repens*.

<sup>6</sup>Shorter GBSSI fragments generated using the waxy K and F primers [6]; indicated by “FK” on Figures 5 and 6.

Sequence sources: [KF600659–KF600709](#), [KF624612](#) [this publication]; X07931 [1]; AF079235–AF079298 [2]; AY010959–AY011011 [3]; AJ007705 [4]; AY115908–AY115966 and AF519111–AF519168 [5]; AY360823–AY360848 and AY362780–AY362791 [6]; AY553236–AY553269 [7]; AY821686–AY821734 [8]; DQ159288–DQ159335 [9]; EU282269–EU282327 [10]; GQ844970–GQ844958 and GQ847675–GQ847736 [11]; HM035223–HM035321 [12].

1. Rohde W, Becker D, Salamini F (1988) Structural analysis of the waxy locus from *Hordeum vulgare*. *Nucleic Acids Research* 16: 7185–7186.
2. Mason-Gamer RJ, Weil CF, Kellogg EA (1998) Granule-bound starch synthase: structure, function, and phylogenetic utility. *Molecular Biology and Evolution* 15: 1658–1673.
3. Mason-Gamer RJ (2001) Origin of North American species of *Elymus* (Poaceae: Triticeae) allotetraploids based on granule-bound starch synthase gene sequences. *Systematic Botany* 26: 757–768.
4. González MC, Echevarría C, Vidal J, Cejudo FJ (2002) Isolation and characterization of a wheat phosphoenolpyruvate carboxylase gene. Modelling of the encoded protein. *Plant Science* 162: 233–238.
5. Mason-Gamer RJ, Orme NL, Anderson CM (2002) Phylogenetic analysis of North American *Elymus* and the monogenomic Triticeae (Poaceae) using three chloroplast DNA data sets. *Genome* 45: 991–1002.
6. Mason-Gamer RJ (2004) Reticulate evolution, introgression, and intertribal gene capture in an allohexaploid grass. *Systematic Biology* 53: 25–37.
7. Helfgott DM, Mason-Gamer RJ (2004) The evolution of North American *Elymus* (Triticeae, Poaceae) allotetraploids: evidence from phosphoenolpyruvate carboxylase gene sequences. *Systematic Botany* 29: 850–861.
8. Mason-Gamer RJ (2005) The  $\beta$ -amylase genes of grasses and a phylogenetic analysis of the Triticeae (Poaceae). *American Journal of Botany* 92: 1045–1058.
9. Mason-Gamer RJ (2007) Allopolyploids of the genus *Elymus* (Triticeae, Poaceae): a phylogenetic perspective. *Aliso* 23: 372–379.
10. Mason-Gamer RJ (2008) Allohexaploidy, introgression, and the complex phylogenetic history on *Elymus repens* (Poaceae). *Molecular Phylogenetics and Evolution* 47: 598–611.
11. Mason-Gamer RJ, Burns MM, Naum M (2010) Phylogenetic relationships and reticulation among Asian *Elymus* (Poaceae) allotetraploids: analysis of three nuclear genes. *Molecular Phylogenetics and Evolution* 54: 10–22.
12. Mason-Gamer RJ, Burns MM, Naum M (2010) Reticulate evolutionary history of a complex group of grasses: phylogeny of *Elymus* **StStHH** allotetraploids based on three nuclear genes. *PLoS ONE* 5: e10989.
