# Supplementary material for: Phylogeny of a Genomically Diverse Group of Elymus (Poaceae) Allopolyploids Reveals Multiple Levels of Reticulation
Source: PubMed Central journal article supplement (PMC3840256; doi:10.1371/journal.pone.0078449), 2013-11-01
Supplement: pone.0078449.s008.pdf [file pone.0078449.s008.pdf]

Table S3. Datasets, partitions where applicable, models selected under AIC criterion, and parameters estimated on the best ML tree.

| Data Set                                     | Partition | Aligned |             | Invariant (I) | Shape ( $\alpha$ ) | Base frequencies |                     | Rate Matrix |
|----------------------------------------------|-----------|---------|-------------|---------------|--------------------|------------------|---------------------|-------------|
|                                              |           | Length  | Model (AIC) |               |                    | (A, C, G, T)     |                     |             |
| cpDNA                                        | trnT-L-F  | 2163    | GTR+G       | 0.0 (fixed)   | 0.1962             | 0.3665, 0.1347,  | AC=1.063, AG=0.722, |             |
|                                              |           |         |             |               |                    | 0.1596, 0.3391   | AT=0.440, CG=0.546, |             |
|                                              | rpoA      | 1375    | GTR+G       | 0.0 (fixed)   | 0.0500             | 0.3576, 0.1578,  | CT=0.794, GT=1.000  |             |
|                                              |           |         |             |               |                    | 0.1805, 0.3041   | AC=1.568, AG=2.219, |             |
| $\beta$ -Amylase                             | Exons     | 608     | K80+G       | 0.0 (fixed)   | 0.4921             | Equal (fixed)    | AT=0.469, CG=1.295, |             |
|                                              | Introns   | 936     | GTR+I+G     | 0.0 (est.)    | 1.2874             | 0.3306, 0.2033,  | CT=4.065, GT=1.000  |             |
|                                              |           |         |             |               |                    | 0.1925, 0.2736   | ti/tv=2.7048        |             |
|                                              |           |         |             |               |                    |                  | AC=1.307, AG=3.529, |             |
|                                              |           |         |             |               |                    |                  | AT=0.993, CG=2.193, |             |
|                                              |           |         |             |               |                    |                  | CT=4.594, GT=1.000  |             |
| pepC                                         | Single    | 1348    | HK+G        | 0.0 (fixed)   | 1.0202             | 0.2307, 0.2211,  | ti/tv=1.8002        |             |
|                                              |           |         |             |               |                    | 0.2363, 0.3120   |                     |             |
| GBSSI-Triticeae                              | Exons     | 759     | GTR+G       | 0.0 (fixed)   | 0.3759             | 0.2307, 0.3074,  | AC=0.619, AG=3.290, |             |
|                                              |           |         |             |               |                    | 0.3089, 0.1531   | AT=0.620, CG=1.063, |             |
|                                              | Introns   | 507     | GTR+G       | 0.0 (fixed)   | 0.9455             | 0.2604, 0.2194,  | CT=6.661, GT=1.000  |             |
|                                              |           |         |             |               |                    | 0.2379, 0.2823   | AC=1.226, AG=2.735, |             |
|                                              |           |         |             |               |                    |                  | AT=0.642, CG=1.350, |             |
|                                              |           |         |             |               |                    |                  | CT=3.323, GT=1.000  |             |
| GBSSI exons-<br>Pooideae and<br>Bambusoideae | Single    | 719     | GTR+I+G     | 0.3077        | 0.7833             | 0.2208, 0.2929,  | AC=1.172, AG=2.858, |             |
|                                              |           |         |             |               |                    | 0.3290, 0.1574   | AT=0.730, CG=1.245, |             |
|                                              |           |         |             |               |                    |                  | CT=4.357, GT=1.000  |             |
